# Supplementary material
Source: PubMed Central journal article supplement (PMC6856441)

### Raw data for Figure 1

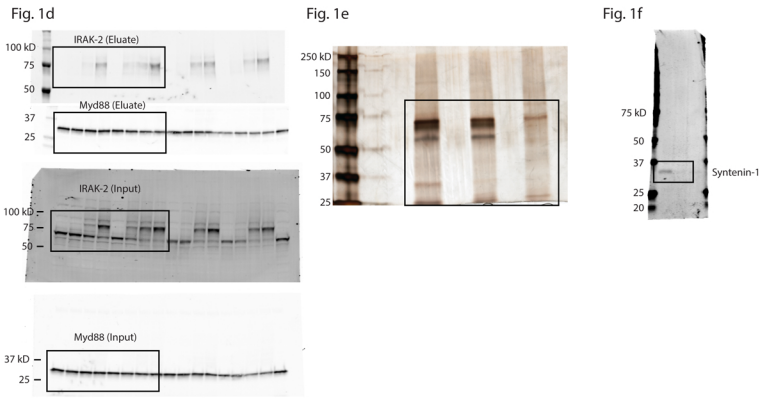

### Raw data for Figure 2

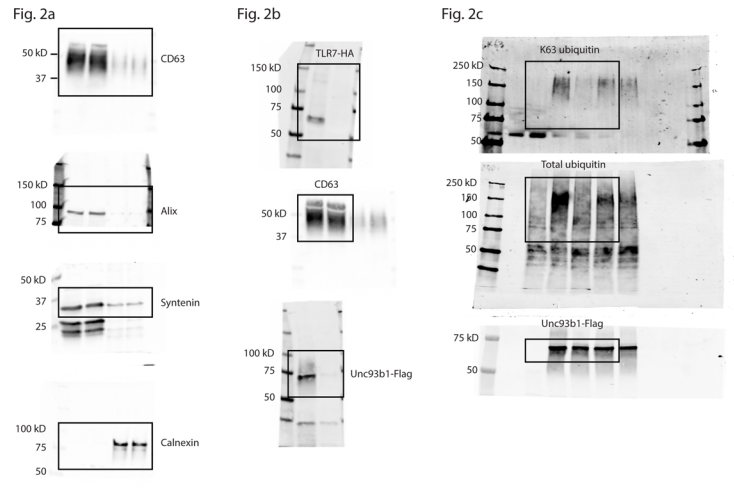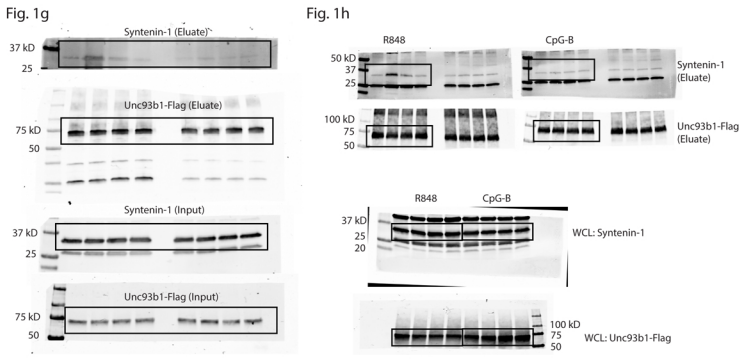

### Raw data for Extended Figure 1

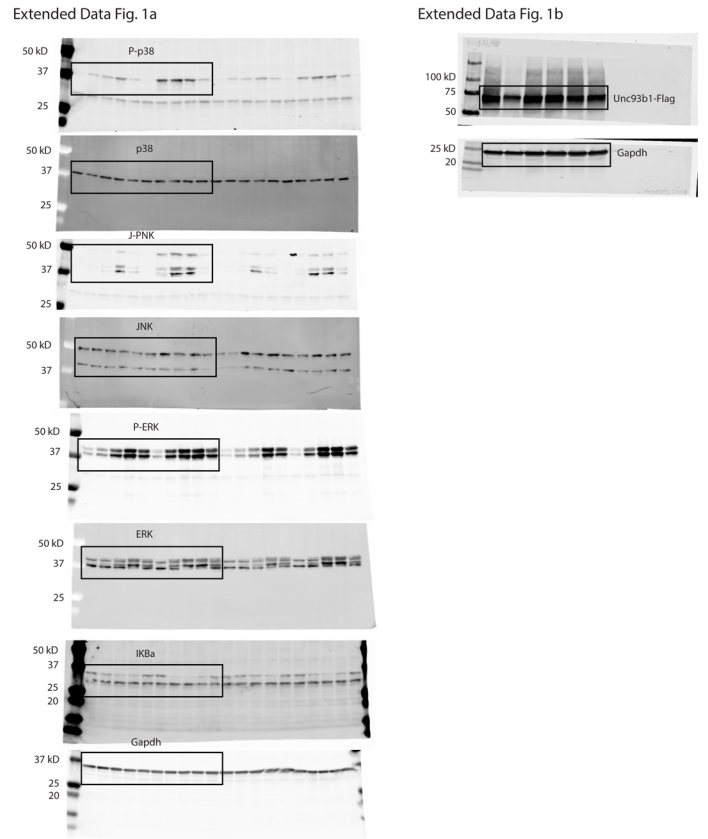

### Raw data for Figure 3

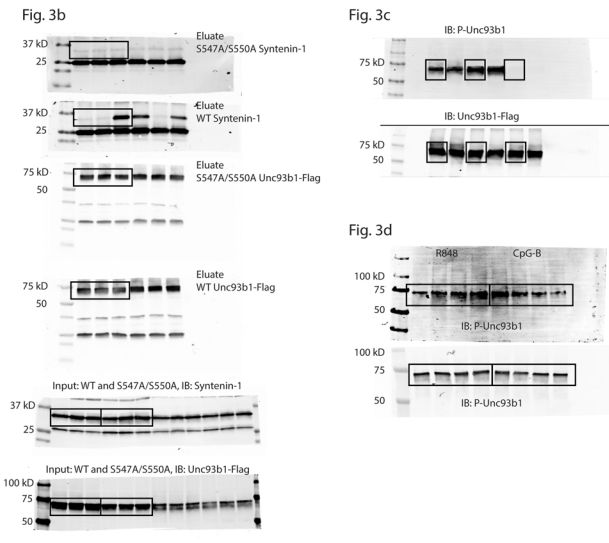

## Raw data for Extended Figure 2

Extended Data Fig. 2c

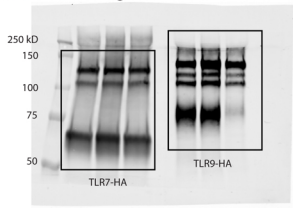

## Raw data for Extended Figure 5

Extended Data Fig. 5a

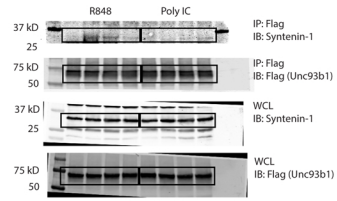

Extended Data Fig. 5b

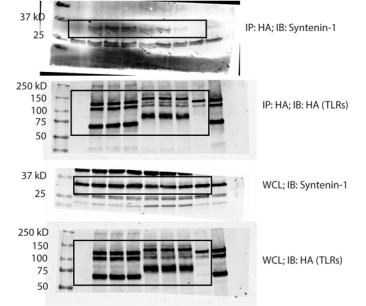

## Raw data for Extended Figure 3

Extended Data Fig. 3a

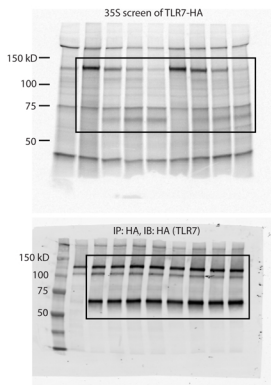

Extended Data Fig. 3b

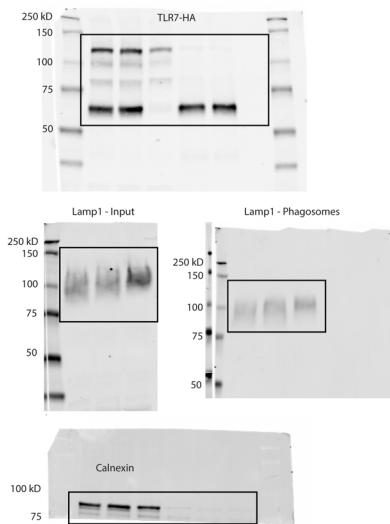

## Raw data for Extended Figure 7

Extended Data Fig. 7a

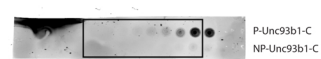

Extended Data Fig. 7e

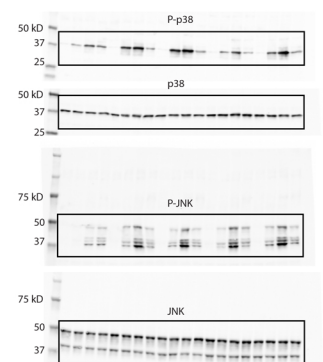

Extended Data Fig. 7b

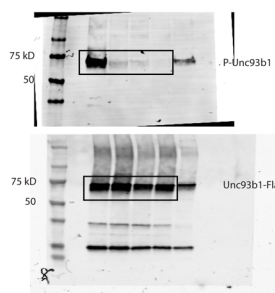

## Raw data for Extended Figure 4

Extended Data Fig. 4a

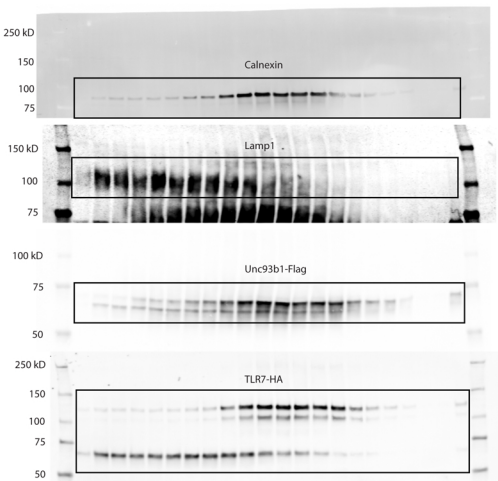

## Raw data for Extended Figure 9

Extended Data Fig. 9j

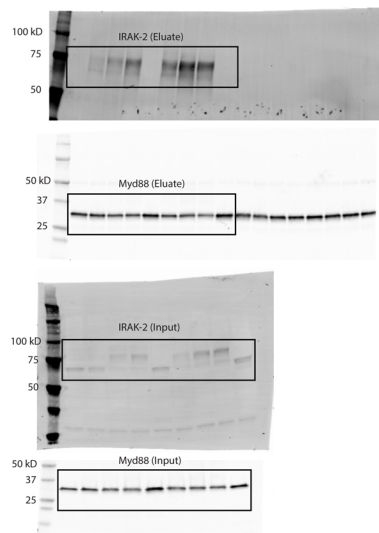

Extended Data Fig. 9k

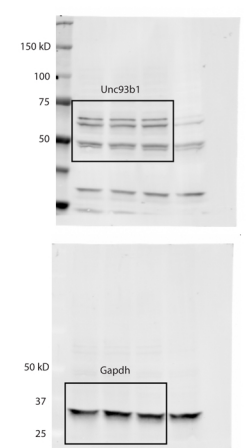

Supplement: NIHMS1538234-supplement-1.pdf [file NIHMS1538234-supplement-1.pdf]
